# Supplementary material for: Sequence Analysis of Novel Staphylococcus aureus Lineages from Wild and Captive Macaques
Source: MDPI journal article supplement (doi:10.3390/ijms231911225), 2022-09-23
Supplement: s1 [file s1]

| Sequence type, (Isolate ID) | GI No. 1<br>upstream <i>dusC</i> ,<br>approx. pos.<br>38,000                                                  | GI No. 2<br>downstream<br><i>dusC</i> , approx.<br>pos. 38,000                                           | GI No. 3,<br>approx. pos.<br>40-80,000                              | GI No. 4,<br>approx. pos.<br>170,000,  | GI No. 5, approx.<br>pos. 280,000                                                                                                                                                                                             | GI No. 6 (ssI/lpf),<br>approx. position<br>400,000                                                                                                                                                                                                                                                                                | GI No. 7,<br>approx. pos.<br>900,000                                                                | GI No. 8,<br>pos.<br>1,500,000                                                                                                 | GI No. 9 ( <i>egc</i> and <i>lukD/E</i> ) approx.<br>pos. 1,800,000                                                                                                                                                                                                                                                                                                                            | GI No. 10<br>( <i>sspP/sspS</i> ),<br>approx. pos.<br>2,000,000 | GI No. 11, approx. pos.<br>2,500,000                                                                                                         | GI No. 12,<br>approx. pos.<br>2,530,000               | GI No. 13<br>(st 'xanthin'),<br>approx.<br>position<br>2,650,000 | GI No.<br>14,<br>approx.<br>pos.<br>2,770,000 |
|-----------------------------|---------------------------------------------------------------------------------------------------------------|----------------------------------------------------------------------------------------------------------|---------------------------------------------------------------------|----------------------------------------|-------------------------------------------------------------------------------------------------------------------------------------------------------------------------------------------------------------------------------|-----------------------------------------------------------------------------------------------------------------------------------------------------------------------------------------------------------------------------------------------------------------------------------------------------------------------------------|-----------------------------------------------------------------------------------------------------|--------------------------------------------------------------------------------------------------------------------------------|------------------------------------------------------------------------------------------------------------------------------------------------------------------------------------------------------------------------------------------------------------------------------------------------------------------------------------------------------------------------------------------------|-----------------------------------------------------------------|----------------------------------------------------------------------------------------------------------------------------------------------|-------------------------------------------------------|------------------------------------------------------------------|-----------------------------------------------|
| ST2990<br>(27-G-H)          | Q7A899, <i>dusC</i> -trnc,<br>DUF81-GI, <i>cstR/A/B</i> -<br>GI, <i>sqr</i> , <i>xyiE2</i>                    | Q6GKK6, Q7A890                                                                                           | <i>lpl</i> , <i>hysA</i> , 5<br>copies of <i>lpl</i>                | Q5HUH7,<br>Q9RL82, A6QDI2              | Q6GK23, Q6GK22,<br>Q6GK21, Q2G192,<br>Q6GK19, Q6GK18,<br>Q6GK17, Q9L3N6,<br>DUF600, a 2 <sup>nd</sup> copy of<br><i>essC</i> , 2 copies of<br>DUF600, Q1Y4R3,<br>DUF600, ADI96784,<br>DUF4064, DUF5084, 2<br>copies of DUF600 | <i>ss</i> /01, <i>ss</i> /02, <i>ss</i> /03, <i>ss</i> /04,<br><i>ss</i> /05, <i>ss</i> /06, <i>ss</i> /07, <i>ss</i> /08,<br><i>ss</i> /09, <i>ss</i> /10, <i>hsdM/S</i> - <i>ssI</i> ,<br><i>ss</i> /11, <i>slafP</i> , Q2G0X2                                                                                                  | <i>appA</i> , <i>appD</i> , <i>appF</i> ,<br><i>appB</i> , <i>appC</i>                              | negative                                                                                                                       | Q5HEX7, A5ITW8, Q6GFQ3, DUF955,<br>Q5HEX3, <i>fstA</i> , AJP22988, DUF1433,<br>DUF1433, Q6GFP5, A0A0E1X646, Q6GFP3,<br><i>hsdS/M</i> - <i>spl</i> , <i>sp</i> /F, <i>sp</i> /E, <i>sp</i> /D1, <i>sp</i> /D2-1, <i>sp</i> /D2-<br>2, <i>sp</i> /C, <i>sp</i> /A, A6QHZ7, <i>ear2</i> , <i>sprB</i> , <i>epiG</i> ,<br>ASITY2, ASITY3, <i>lukD/E</i> , <i>sprC1</i> , Q2FXA9,<br>Q2FXA8, Q7A4X2 | <i>sspP/sspS</i>                                                | teg131, 3 copies of<br><i>lpl</i> sauUSI, <i>nudix</i>                                                                                       | A8YYP8,<br><i>sasG</i> , <i>sarT</i> ,<br><i>sarU</i> | <i>cbiQ</i> , <i>cbiO</i> ,<br>UPF0397,<br>DUF62                 | <i>cna</i>                                    |
| ST3268<br>(Ma2/A14043)      | mcrB, mcrC, tnp_IS1,<br>tnp_IS232, Q6GD44,<br><i>dusC</i> -trnc, DUF81-GI,<br><i>cstR/A/B</i> -GI, <i>sqr</i> | Q6GKK6, <i>yycY</i> ,<br>G7ZTC1, Q2YUT3                                                                  | 3 copies of <i>lpl</i>                                              | Q5HUH7-trnc                            | Transposon with the<br>penicillinase operon,<br>followed by 3copies of<br>DUF600                                                                                                                                              | <i>ss</i> /01, <i>ss</i> /02, <i>ss</i> /03, <i>ss</i> /04,<br><i>ss</i> /05, <i>ss</i> /06, <i>ss</i> /07, <i>ss</i> /08,<br><i>ss</i> /09, <i>ss</i> /10, <i>hsdM/S</i> - <i>ssI</i> ,<br><i>ss</i> /11, <i>slafP</i> , Q2G0X2,<br><i>lip7</i> , <i>istB2</i> IS232,<br>tnp_IS232                                               | <i>appA</i> , <i>appD</i> , <i>appF</i> ,<br><i>appB</i> , <i>appC</i>                              | Q2YY95,<br><i>sagD</i> , <i>sagC</i> ,<br><i>nfnB</i> , D9RHF6,<br>Q2YYD5,<br>D9RHF8, <i>stsA</i> ,<br>tnp_IS232,<br>tnp_IS200 | Q5HEX7, A5ITW8, Q6GFQ3, DUF955,<br>Q5HEX3, DUF1433, <i>hysA</i> , DUF1433,<br>ERS140266 RS01930, <i>hsdS/M</i> - <i>spl</i> , <i>ear2</i> ,<br><i>sprB</i> , <i>epiG</i> , ASITY2, ASITY3, <i>lukD/E</i> , <i>sprC1</i> ,<br>Q2FXA9, Q2FXA8, Q99T51, A6U2S7,<br>Q7A4X2, <i>seg/n/u/i/m/o</i>                                                                                                   | <i>sspP/sspS</i>                                                | teg131, sau961, dcm_Sau961                                                                                                                   | A8YYP8,<br><i>sasG</i> , <i>sarT</i> ,<br><i>sarU</i> | <i>cbiQ</i> , <i>cbiO</i> ,<br>UPF0397,<br>DUF62                 | negative                                      |
| ST4168<br>(16CS0209)        | tnp_ISSha1, C2G7A0,<br>Q6GKL3, C2G798,<br>UPI0001C11B31,<br>Q6GKL1, tnp_IS232,<br>Q6GD44                      | Q6GKK6, Q7A890                                                                                           | <i>lpl</i>                                                          | Q5HUH7-trnc                            | A0A0E0VL30,<br>DUF5082,<br>UPI0001C11B8A,<br>Q1Y4R2, Q6GK19,<br>DUF5085, Q1Y4R3, 2<br>copies of DUF600,<br>Q1Y4R2, Q1Y4R3,<br>Q9L3N6, 4 copies of<br>DUF600                                                                   | <i>ss</i> /01, <i>ss</i> /02, <i>ss</i> /03, <i>ss</i> /05,<br><i>ss</i> /07, <i>ss</i> /09, <i>ss</i> /10,<br><i>hsdM/S</i> - <i>ssI</i> , <i>ss</i> /11, <i>slafP</i> ,<br>Q2G0X2, 4 copies of <i>lpl</i> ,<br><i>lipC3</i> ,                                                                                                   | <i>oppC</i> -GI-RF122,<br><i>oppD</i> -GI-RF122,<br><i>oppF</i> -GI-RF122,<br><i>oppA</i> -GI-RF122 | Q931R4                                                                                                                         | Q5HEX7, A5ITW8, Q5HEX3, <i>sprA</i> , <i>hsdS/M</i> -<br><i>spl</i> , <i>sp</i> /F, <i>sp</i> /E, <i>sp</i> /D2, <i>sp</i> /C/B/A, <i>ear2</i> , <i>epiG</i> ,<br>ERS140266 RS14190, <i>epiF</i> , <i>epiD</i> , <i>epiC</i> , <i>epiB</i> ,<br><i>epiA</i> , <i>lukD/E</i> , <i>sprC1</i> , Q6GFN4, tnp_IS1,<br>Q7A4X2, <i>seg/n/u/i/m/o</i>                                                  | <i>sspP/sspS</i>                                                | teg131                                                                                                                                       | A8YYP8,<br><i>sasG</i> , <i>sarT</i> ,<br><i>sarU</i> | <i>cbiQ</i> , <i>cbiO</i> ,<br>UPF0397,<br>DUF62                 | <i>cna</i>                                    |
| ST7687<br>(01-RR-86)        | Q7A899, <i>dusC</i> -trnc,<br>DUF81-GI, <i>cstR/A/B</i> -<br>GI, <i>sqr</i> , <i>xyiE2</i><br>(as in CC5/8)   | Q6GKK6, Q7A890                                                                                           | 3 copies of <i>lpl</i>                                              | Q5HUH7,<br>Q9RL82, A6QDI2              | A0A0E0VL30,<br>DUF5082,<br>UPI0001C11B8A,<br>Q6GK19, DUF5085,<br>Q1Y4R3, Q9L3N6,<br>DUF600, Q1Y4R2, 3<br>copies of DUF600                                                                                                     | <i>ss</i> /01, <i>ss</i> /02, <i>ss</i> /03, <i>ss</i> /04,<br><i>ss</i> /05, <i>ss</i> /06, <i>ss</i> /07, <i>ss</i> /08,<br><i>ss</i> /09, <i>ss</i> /10, <i>hsdM/S</i> - <i>ssI</i> ,<br><i>ss</i> /11, <i>slafP</i> , Q2G0X2, 6<br>copies of <i>lpl</i> , <i>lipC3</i>                                                        | <i>appA</i> , <i>appD</i> , <i>appF</i> ,<br><i>appB</i> , <i>appC</i>                              | Q2YY95,<br><i>sagD</i> , <i>sagC</i> ,<br><i>nfnB</i> , D9RHF6,<br>Q2YYD5,<br>D9RHF8, <i>stsA</i>                              | Q5HEX7, A5ITW8, DUF955, Q5HEX3,<br>DUF1433, <i>sprA</i> , AJP22988, 3 copies of<br>DUF1433, <i>hsdS/M</i> - <i>spl</i> , <i>sp</i> /C/B/A,<br>A6QHZ7, <i>ear2</i> , <i>sprB</i> , <i>epiG</i> , ASITY2, ASITY3,<br><i>lukD/E</i> , <i>sprC1</i> , Q2FXA9, Q2FXA8, Q7A4X2                                                                                                                       | <i>sspP/sspS</i>                                                | teg131, Q5HD68, D2NA72,<br><i>lipC3</i> , 3 copies of <i>lpl</i> ,<br>sauS0385, dcm_SauS0385                                                 | A8YYP8,<br><i>sasG</i> , <i>sarT</i> ,<br><i>sarU</i> | <i>cbiQ</i> , <i>cbiO</i> ,<br>UPF0397,<br>DUF62                 | negative                                      |
| ST7688<br>(05-RR-90)        | Q7A899, <i>dusC</i> -trnc,<br>DUF81-GI, <i>cstR/A/B</i> -<br>GI, <i>sqr</i> , <i>xyiE2</i>                    | Q5HJT2, Q6GD34,<br>A6QD75, A6QD76,<br>A8YZ18, Q6GKK6,<br><i>yycY</i> , G7ZTC1,<br>Q7A890, Q2YUT3         | 3 copies of <i>lpl</i>                                              | Q5HUH7,<br>Q9RL82, A6QDI2              | Q6GK23, Q6GK22,<br>Q6GK21, Q2G192,<br>Q6GK19, Q6GK18,<br>Q6GK17, Q9L3N6,<br>Q1Y4R2, Q1Y4R3, and 8<br>copies of DUF600                                                                                                         | <i>ss</i> /01, <i>ss</i> /02, <i>ss</i> /03, <i>ss</i> /04,<br><i>ss</i> /05, <i>ss</i> /07, <i>ss</i> /08, <i>ss</i> /09,<br><i>ss</i> /10, <i>hsdM/S</i> - <i>ssI</i> , <i>ss</i> /11,<br><i>slafP</i> , Q2G0X2, 3 copies<br>of <i>lpl</i> , tnp_IS232,<br><i>istB2</i> IS232, 3 copies of<br><i>lpl</i> , <i>lipC3</i> SAV0446 | <i>appA</i> , <i>appD</i> , <i>appF</i> ,<br><i>appB</i> , <i>appC</i>                              | D9RHF6,<br>Q2YYD5,<br>D9RHF8, <i>stsA</i>                                                                                      | Q5HEX7, A5ITW8, Q6GFQ3, DUF955, 4<br>copies of DUF1433, <i>hysA</i> , Q5HE01, <i>hsdS/M</i> -<br><i>spl</i> , <i>sp</i> /F, <i>sp</i> /E, <i>sp</i> /D1, <i>sp</i> /C/B/A, A6QHZ7,<br><i>ear2</i> , <i>sprB</i> , <i>epiG</i> , ASITY2, ASITY3, <i>lukD</i> ,<br><i>lukE</i>                                                                                                                   | <i>sspP/sspS</i>                                                | teg131, 2 copies of <i>lpl</i> ,<br>Q5HD68, D2NA72, <i>lipC3</i> , 2<br>copies of <i>lpl</i> , dcm_Sau3A1,<br>sau3A1                         | A8YYP8,<br><i>sasG</i> , <i>sarT</i> ,<br><i>sarU</i> | <i>cbiQ</i> , <i>cbiO</i> ,<br>UPF0397,<br>DUF62                 | negative                                      |
| ST7689<br>(08-G-E)          | Q6GD44                                                                                                        | Q6GKK6, Q7A890                                                                                           | 2 copies of <i>lpl</i> ,<br><i>lipC3</i>                            | Q5HUH7,<br>Q9RL82, A6QDI2              | <i>essC</i> , <i>essB</i> , <i>esaE</i> , <i>essD</i> ,<br><i>essD</i> , Q1Y4R2, Q1Y4R3,<br>3 copies of DUF600,<br>Q1Y4R2, Q1Y4R3, 2<br>copies of DUF600,<br>ADI96784, DUF4064,<br>DUF5084, 3 copies of<br>DUF600             | <i>ss</i> /01, <i>ss</i> /02, <i>ss</i> /03, <i>ss</i> /04,<br><i>ss</i> /05, <i>ss</i> /07, <i>ss</i> /08, <i>ss</i> /09,<br><i>ss</i> /10, <i>hsdM/S</i> - <i>ssI</i> , <i>ss</i> /11,<br><i>slafP</i> , Q2G0X2, 6 copies<br>of <i>lpl</i> , <i>lipC3</i>                                                                       | <i>appA</i> , <i>appD</i> , <i>appF</i> ,<br><i>appB</i> , <i>appC</i>                              | negative                                                                                                                       | Q5HEX7, A5ITW8, Q6GFQ3, DUF955,<br>Q5HEX3, tnp_IS3, <i>sprA</i> , DUF1433, Q6GFP5,<br>A0A0E1X646, <i>hsdS/M</i> - <i>spl</i> , <i>sp</i> /F, <i>sp</i> /D1,<br><i>sp</i> /C/B/A, A6QHZ7, <i>ear2</i> , <i>sprB</i> , ASITY2,<br><i>lukD/E</i> , Q2FXA9, Q2FXA8, Q99T51,<br>A6U2S7, Q7A4X2, <i>seg/n/u/i/m/o</i>                                                                                | <i>sspP/sspS</i>                                                | teg131, 2 copies of <i>lpl</i> ,<br>Q5HD68, D2NA72, <i>lipC3</i> , 3<br>copies of <i>lpl</i> , sauUSI, <i>nudix</i>                          | A8YYP8,<br><i>sasG</i> , <i>sarT</i> ,<br><i>sarU</i> | <i>cbiQ</i> , <i>cbiO</i> ,<br>UPF0397,<br>DUF62                 | negative                                      |
| ST7690<br>(09-G-F)          | Q7A899, <i>dusC</i> -trnc,<br>DUF81-GI, <i>cstR/A/B</i> -<br>GI, <i>sqr</i> , <i>xyiE2</i>                    | Q5HJT2, Q6GD34,<br>A6QD75, A6QD76,<br>A8YZ18, Q6GKK6,<br><i>yycY</i> , tnp-Q6GH59,<br>tnp-Q6GJF3, Q7A890 | 3 copies of <i>lpl</i> ,<br><i>hysA</i> , 3 copies<br>of <i>lpl</i> | Q5HUH7, tnp-<br>Q6GH59, tnp-<br>Q6GJF3 | Q6GK23, Q6GK22,<br>Q6GK21, Q2G192,<br>Q6GK19, Q6GK18,<br>Q6GK17, Q9L3N6, 4<br>copies of DUF600,<br>Q1Y4R2, Q1Y4R3, 4<br>copies of DUF600                                                                                      | <i>ss</i> /01, <i>ss</i> /02, <i>ss</i> /03, <i>ss</i> /04,<br><i>ss</i> /05, <i>ss</i> /07, <i>ss</i> /08, <i>ss</i> /09,<br><i>ss</i> /10, <i>hsdM/S</i> - <i>ssI</i> , <i>ss</i> /11,<br><i>slafP</i> , Q2G0X2, 6 copies<br>of <i>lpl</i> , <i>lipC3</i>                                                                       | <i>appA</i> , <i>appD</i> , <i>appF</i> ,<br><i>appB</i> , <i>appC</i>                              | negative                                                                                                                       | Q6GFQ3, DUF955, Q5HEX3, <i>istB2</i> IS232,<br>tnp_IS232, <i>sprA</i> , DUF1433, Q6GFP5,<br>A0A0E1X646, <i>hsdS/M</i> - <i>spl</i> , <i>sp</i> /F, <i>sp</i> /E,<br><i>sp</i> /C/B/A, A6QHZ7, <i>ear2</i> , <i>sprB</i> , <i>epiG</i> ,<br>ASITY2, ASITY3, <i>lukD/E</i> , Q2FXA9, Q2FXA8,<br>Q2FXA8, Q7A4X2                                                                                   | <i>sspP/sspS</i>                                                | teg131, 4 copies of <i>lpl</i><br><i>istB2</i> IS232, tnp_IS232,<br>Q5HD68, D2NA72, <i>lipC3</i> ,<br><i>lpl</i> , sauS0385,<br>dcm_SauS0385 | A8YYP8,<br><i>sasG</i> , <i>sarT</i> ,<br><i>sarU</i> | <i>cbiQ</i> , <i>cbiO</i> ,<br>UPF0397,<br>DUF62                 | <i>cna</i>                                    |
| ST7691<br>(13-G-52)         | Q6GD44                                                                                                        | Q6GKK6, Q7A890                                                                                           | 2 copies of <i>lpl</i> ,<br><i>lipC3</i>                            | Q5HUH7,<br>Q9RL82, A6QDI2              | <i>essC</i> , <i>essB</i> , <i>esaE</i> , <i>essD</i> ,<br><i>essD</i> , TIGR01741,<br>Q1Y4R2, Q1Y4R3,<br>DUF600                                                                                                              | <i>ss</i> /01, <i>ss</i> /02, <i>ss</i> /03, <i>ss</i> /04,<br><i>ss</i> /05, <i>ss</i> /06, <i>ss</i> /07, <i>ss</i> /08,<br><i>ss</i> /09, <i>ss</i> /10, <i>hsdM/S</i> - <i>ssI</i> ,<br><i>ss</i> /11, <i>slafP</i> , Q2G0X2, 6<br>copies of <i>lpl</i> , <i>lipC3</i>                                                        | <i>appA</i> , <i>appD</i> , <i>appF</i> ,<br><i>appB</i> , <i>appC</i>                              | negative                                                                                                                       | Q6GFQ3, DUF955, Q5HEX3, tnp_IS3, <i>sprA</i> ,<br>DUF1433, Q6GFP5, A0A0E1X646, <i>hsdS/M</i> -<br><i>spl</i> , <i>sp</i> /F, <i>sp</i> /D1, <i>sp</i> /C/B/A, A6QHZ7, <i>ear2</i> ,<br><i>sprB</i> , ASITY2, <i>lukD/E</i> , Q2FXA9, Q2FXA8,<br>Q99T51, A6U2S7, Q7A4X2, <i>seg/n/u/i/m/o</i>                                                                                                   | <i>sspP/sspS</i>                                                | teg131, <i>lpl</i> , Q5HD68,<br>D2NA72, <i>lipC3</i> , 3 copies of<br><i>lpl</i> sauUSI, <i>nudix</i>                                        | A8YYP8,<br><i>sasG</i> , <i>sarT</i> ,<br><i>sarU</i> | <i>cbiQ</i> , <i>cbiO</i> ,<br>UPF0397,<br>DUF62                 | <i>cna</i>                                    |
| ST7692<br>(17-H-61)         | Q6GD44                                                                                                        | Q5HJT2, Q6GD34,<br>A6QD75, A6QD76,<br>A8YZ18, Q6GKK6,<br><i>yycY</i> , G7ZTC1,<br>Q7A890, Q2YUT3         | 4 copies of <i>lpl</i>                                              | Q5HUH7,<br>Q9RL82, A6QDI2              | Q6GK23, Q6GK22,<br>Q6GK21, Q2G192,<br>Q6GK19, Q6GK18,<br>Q9L3N6, 2 copies of<br>DUF600, Q1Y4R3,<br>DUF600                                                                                                                     | <i>ss</i> /01, <i>ss</i> /02, <i>ss</i> /03, <i>ss</i> /04,<br><i>ss</i> /05, <i>ss</i> /07, <i>ss</i> /08, <i>ss</i> /09,<br><i>ss</i> /10, <i>hsdM/S</i> - <i>ssI</i> , <i>ss</i> /11,<br><i>slafP</i> , Q2G0X2, 5 copies<br>of <i>lpl</i> , <i>lipC3</i>                                                                       | <i>appA</i> , <i>appD</i> , <i>appF</i> ,<br><i>appB</i> , <i>appC</i>                              | Q2YY95,<br><i>sagC</i> ,<br><i>nfnB</i> , D9RHF6,<br>Q2YYD5,<br>D9RHF8, <i>stsA</i>                                            | Q5HEX7, A5ITW8, Q6GFQ3, DUF955,<br>Q5HEX3, AJP22988, DUF1433, DUF1433,<br>DUF1433, DUF1433, <i>hysA</i> , A0A0E1X646,<br><i>hsdS/M</i> - <i>spl</i> , <i>sp</i> /F, <i>sp</i> /E, <i>sp</i> /D1, <i>sp</i> /C/B/A,<br>A6QHZ7, <i>ear2</i> , <i>sprB</i> , <i>epiG</i> , ASITY2, ASITY3,<br><i>lukD/E</i> , A6U2S7, Q7A4X2, Q99T51, <i>int-2b</i>                                               | <i>sspP/sspS</i>                                                | teg131, 4 copies of <i>lpl</i><br>Q5HD68, D2NA72,<br><i>lipC3</i> , SACOL2496, 2 copies<br>of <i>lpl</i> dcm_Sau3A1, sau3A1                  | A8YYP8,<br><i>sasG</i> , <i>sarT</i> ,<br><i>sarU</i> | <i>cbiQ</i> , <i>cbiO</i> ,<br>UPF0397,<br>DUF62                 | negative                                      |
| ST7693<br>(29-P-01)         | negative                                                                                                      | Q6GKK6, <i>yycY</i> ,<br>G7ZTC1, Q7A890,<br>Q2YUT3                                                       | <i>lpl</i>                                                          | Q5HUH7,<br>Q9RL82, A6QDI2              | <i>essC</i> , <i>essB</i> , <i>esaE</i> , <i>essD</i> ,<br><i>essD</i> , TIGR01741,<br>Q1Y4R2, Q1Y4R3,<br>DUF600                                                                                                              | <i>ss</i> /01, <i>ss</i> /02, <i>ss</i> /03, <i>ss</i> /04,<br><i>ss</i> /05, <i>ss</i> /07, <i>ss</i> /08, <i>ss</i> /09,<br><i>ss</i> /10, <i>hsdM/S</i> - <i>ssI</i> , <i>ss</i> /11,<br><i>slafP</i> , Q2G0X2, 6 copies<br>of <i>lpl</i> , <i>lipC3</i>                                                                       | <i>appA</i> , <i>appD</i> , <i>appB</i> ,<br><i>appC</i>                                            | negative                                                                                                                       | Q6GFQ3, DUF955, Q5HEX3, <i>sprA</i> ,<br>DUF1433, Q6GFP5, A0A0E1X646, <i>hsdS/M</i> -<br><i>spl</i> , <i>sp</i> /F, <i>sp</i> /E, <i>sp</i> /D1, <i>sp</i> /C/B/A, A6QHZ7,<br><i>ear2</i> , <i>sprB</i> , ASITY2, <i>lukD/E</i> , A6U2S7,<br>Q7A4X2, Q99T51, <i>int-2b</i>                                                                                                                     | <i>sspP/sspS</i><br><i>sspP/sspS</i>                            | teg131, Q5HD68, D2NA72,<br><i>lipC3</i> , <i>lpl</i> , tx universal3,<br>dcm_SauRF122, sauRF122,<br>zoo28neu_002509                          | Q5HJU6, <i>sarT</i> ,<br><i>sarU</i>                  | <i>cbiQ</i> , <i>cbiO</i> ,<br>UPF0397,<br>DUF62                 | negative                                      |
| ST7694<br>(40-B-50)         | negative                                                                                                      | Q6GKK6, <i>yycY</i> ,<br>G7ZTC1, Q7A890,<br>Q2YUT3                                                       | 5 copies of <i>lpl</i>                                              | Q5HUH7-trnc                            | <i>essC</i> , <i>essB</i> , <i>esaE</i> , <i>essD</i> ,<br><i>essD</i> , TIGR01741,<br>Q1Y4R2, Q1Y4R3,<br>DUF600                                                                                                              | <i>ss</i> /01, <i>ss</i> /02, <i>ss</i> /03, <i>ss</i> /04,<br><i>ss</i> /05, <i>ss</i> /07, <i>ss</i> /08, <i>ss</i> /09,<br><i>ss</i> /10, <i>hsdM/S</i> - <i>ssI</i> , <i>ss</i> /11,<br><i>slafP</i> , Q2G0X2                                                                                                                 | <i>appA</i> , <i>appD</i> , <i>appF</i> ,<br><i>appB</i> , <i>appC</i>                              | D9RHF6,<br>Q2YYD5,<br>D9RHF8, <i>stsA</i>                                                                                      | Q5HEX7, A5ITW8, Q6GFQ3, DUF955,<br>Q5HEX3, <i>sprA</i> , DUF1433, Q6GFP5,<br>A0A0E1X646, <i>hsdS/M</i> - <i>spl</i> , <i>sp</i> /F, <i>sp</i> /D1,<br><i>sp</i> /C/B/A, A6QHZ7, <i>ear2</i> , <i>sprB</i> , <i>epiG</i> ,<br>ASITY2, ASITY3, <i>lukD/E</i> , <i>sprC1</i> , Q2FXA9,<br>Q2FXA8, Q7A4X2                                                                                          | <i>sspP/sspS</i>                                                | teg131, 4 copies of <i>lpl</i><br>sauUSI, <i>nudix</i>                                                                                       | A8YYP8,<br><i>sasG</i> , <i>sarT</i> ,<br><i>sarU</i> | <i>cbiQ</i> , <i>cbiO</i> ,<br>UPF0397,<br>DUF62                 | negative                                      |
| ST7695<br>(16CS0212)        | Q6GKL6                                                                                                        | Q5HJT2, Q6GD34,<br>A6QD75, A6QD76,<br>A8YZ18, Q6GKK6,<br><i>yycY</i> , G7ZTC1                            | <i>lpl</i>                                                          | Q5HUH7,<br>Q9RL82, A6QDI2              | <i>essC</i> , <i>essB</i> , <i>esaE</i> , <i>essD</i> ,<br><i>essD</i> , Q1Y4R2, Q1Y4R3,<br>Q1Y4R3, Q9L3N6,<br>DUF600, ADI96784,<br>DUF4064, DUF5084                                                                          | <i>ss</i> /01, <i>ss</i> /02, <i>ss</i> /04, <i>ss</i> /05,<br><i>ss</i> /07, <i>ss</i> /08, <i>ss</i> /09, <i>ss</i> /10,<br><i>hsdM/S</i> - <i>ssI</i> , <i>ss</i> /11, <i>slafP</i> ,<br>Q2G0X2, 5 copies of <i>lpl</i> ,<br><i>lipC3</i>                                                                                      | <i>appA</i> , <i>appD</i> , <i>appF</i> ,<br><i>appB</i> , <i>appC</i>                              | negative                                                                                                                       | Q5HEX7, A5ITW8, <i>sprA</i> , DUF1433, <i>hysA</i> ,<br>DUF1433, Q6GFP5, A0A0E1X646, <i>hsdS/M</i> - <i>spl</i> , <i>sp</i> /F,<br><i>sp</i> /D2, <i>sp</i> /C/B/A, <i>ear2</i> , <i>epiG</i> ,<br>ERS140266 RS14190, <i>epiE</i> /P/D/C/B/A,<br><i>bsaX</i> , <i>lukD/E</i> , <i>sprC1</i> , Q2FXA9, Q2FXA8                                                                                   | <i>sspP/sspS</i>                                                | teg131, BDS-53E_002366,<br><i>lpl</i> , Q5HD68, D2NA72,<br><i>lipC3</i> , 2 copies of <i>lpl</i><br>dcm_Sau3A1, sau3A1                       | negative                                              | negative                                                         | negative                                      |

| Sequence type,<br>(Isolate ID) | GI No. 1<br>upstream <i>dusC</i> ,<br>approx. pos.<br>38,000                                                                                                        | GI No. 2<br>downstream<br><i>dusC</i> , approx.<br>pos. 38,000                       | GI No. 3,<br>approx. pos.<br>40-80,000                             | GI No. 4,<br>approx. pos.<br>170,000,                                                                 | GI No. 5, approx.<br>pos. 280,000                                                                                                                                      | GI No. 6 ( <i>ssI/lpl</i> ),<br>approx. position<br>400,000                                                                                                                | GI No. 7,<br>approx. pos.<br>900,000                                             | GI No. 8,<br>pos.<br>1,500,000                                   | GI No. 9 ( <i>egc</i> and <i>lukD/E</i> ) approx.<br>pos. 1,800,000                                                                                                                                                              | GI No. 10<br>( <i>sspP/sspS</i> ),<br>approx. pos.<br>2,000,000 | GI No. 11, approx. pos.<br>2,500,000                                                                                                            | GI No. 12,<br>approx. pos.<br>2,530,000 | GI No. 13<br>(st'xanthin),<br>approx.<br>position<br>2,650,000 | GI No.<br>14,<br>approx.<br>pos.<br>2,770,000 |
|--------------------------------|---------------------------------------------------------------------------------------------------------------------------------------------------------------------|--------------------------------------------------------------------------------------|--------------------------------------------------------------------|-------------------------------------------------------------------------------------------------------|------------------------------------------------------------------------------------------------------------------------------------------------------------------------|----------------------------------------------------------------------------------------------------------------------------------------------------------------------------|----------------------------------------------------------------------------------|------------------------------------------------------------------|----------------------------------------------------------------------------------------------------------------------------------------------------------------------------------------------------------------------------------|-----------------------------------------------------------------|-------------------------------------------------------------------------------------------------------------------------------------------------|-----------------------------------------|----------------------------------------------------------------|-----------------------------------------------|
| ST7745<br>(03-RR-88)           | <i>lrpC</i> , Q6GD44                                                                                                                                                | Q6GKK6, Q7A890                                                                       | 5 copies of <i>lpl</i>                                             | Q5HUH7,<br>Q9RL82, A6QDI2                                                                             | Q6GK23, Q6GK22,<br>Q6GK21, Q6GK19,<br>Q6GK18, Q6GK17,<br>Q9L3N6, TIGR01741, 2<br>copies of DUF600,<br>AD196784, DUF4467,<br>DUF4064, DUF5084,<br>DUF600                | <i>ssI01, ssI02, ssI03, ssI04, ssI05, ssI06, ssI07, ssI08, ssI09, ssI10, hsdM/S-ssI, ssI11, slaP, Q2G0X2, lpl, locus-0450, tnp IS232, istB2 IS232, lipC3_SAA6159_00398</i> | <i>appA, appD, appF, appB, appC</i>                                              | Q2YY95,<br><i>sagD, sagC, nfbB, D9RHF6, Q2YYD5, D9RHF8, stsA</i> | Q5HEX7, A5ITW8, Q6GFQ3, DUF955,<br>DUF1433, <i>sprA</i> , AJP22988, 2 copies of<br>DUF1433, <i>hsdS/M-spl, spIF, spIC/B/A, A6QHZ7, ear2, sprB, epiG, A5ITY2, A5ITY3, lukD/E, sprC1, Q2FXA9, Q2FXA8, Q7A4X2</i>                   | <i>sspP/sspS</i>                                                | <i>teg131, Q5HD68, D2NA72, lipC3, lpl, dcm SauRF122, sauRF122</i>                                                                               | negative                                | <i>cbiO, cbiO, UPF0397, DUF62</i>                              | <i>cna</i>                                    |
| ST7746<br>(07-G-D)             | Q7A899, <i>dusC</i> -trnc,<br>DUF81-GI, <i>csrR/A/B-GI, sgr, yxiE2</i>                                                                                              | Q5HJT2, Q6GD34,<br>A6QD75, A6QD76,<br>A8YZ18, Q6GKK6,<br><i>ycjY, G7ZTC1, Q7A890</i> | 6 copies of <i>lpl</i>                                             | A5IP65, A5IP66,<br>A5IP67, A5IP68,<br>A5IP69, A5IP70,<br>A5IP71, A5IP72,<br>A6TXY8, A5IP73,<br>A6QDI2 | A0A0Z1N098,<br>A0A0U0VFZ6,<br>A0A122YW60,<br>AD196784, DUF4064,<br>DUF5084, Q1Y4R2,<br>Q1Y4R3, Q9L3N6, 2<br>copies of DUF600,<br>Q1Y4R2, Q1Y4R3, 2<br>copies of DUF600 | <i>ssI01, ssI02, ssI03, ssI04, ssI05, ssI06, ssI07, ssI08, ssI09, ssI10, hsdM/S-ssI, ssI11, slaP, Q2G0X2</i>                                                               | <i>appA, appD, appF, appB, appC</i>                                              | negative                                                         | DUF1433, 2 copies of DUF1433,<br>Q6GFP5, A0A0E1X646, <i>hsdS/M-spl, spIF, spIC/B/A, A6QHZ7, ear2, sprB, epiG, A5ITY2, A5ITY3, lukD/E, sprC1, Q2FXA9, Q2FXA8, Q7A4X2</i>                                                          | <i>sspP/sspS</i>                                                | <i>teg131, 2 copies of lpl, Q5HD68, D2NA72, lipC3, lpl, tnp IS232, istB2 IS232, 2 copies of lpl, D2NA72, lipC3, lpl, sauS0385, dcm_SauS0385</i> | negative                                | <i>cbiQ, cbiO, UPF0397, DUF62</i>                              | <i>cna</i>                                    |
| ST7747<br>(12-G-51)            | H0CD41, D2N3D1,<br>C2G7A0, Q6GKL3,<br>C2G798,<br>UPI0001C11B31,<br>D2N3E0, Q6GKL1,<br>tnp IS232, Q6GD44<br><br><i>Similar as in CC398<br/>(except for some tnp)</i> | Q6GKK6, Q7A890                                                                       | <i>lpl, hysA, 2<br/>copies of lpl, istB2 IS232, tnp IS232, lpl</i> | Q5HUH7,<br>Q9RL82, A6QDI2                                                                             | A0A0E0VL30,<br>DUF5082,<br>UPI0001C11B8A,<br>Q1Y4R2, Q6GK19,<br>DUF5085, Q1Y4R3,<br>Q9L3N6, DUF600,<br>Q1Y4R2, Q1Y4R3, 3<br>copies of DUF600                           | <i>ssI01, ssI02, ssI03, ssI04, ssI05, ssI07, ssI08, ssI09, ssI10, hsdM/S-ssI, ssI11, slaP, Q2G0X2, istB2 IS232, tnp IS232, 3 copies of lpl</i>                             | <i>appA, appD, appF, appB, appC</i>                                              | Q2YY95,<br><i>sagD, sagC, nfbB, D9RHF6, Q2YYD5, D9RHF8, stsA</i> | Q5HEX7, A5ITW8, Q6GFQ3, DUF955,<br>Q5HEX3, DUF1433, <i>hysA, hsdS/M-spl, spIF, spIC/B/A, A6QHZ7, ear2, sprB, epiG, ERS140266 RS14190, epiE/F/P/D/C/B/A, bsaX, epiA, lukD/E, Q2Y2TQ0, Q6GFN4, tnp IS1, A6U2S7, Q7A4X2, Q99T51</i> | <i>sspP/sspS</i>                                                | <i>teg131, lpl, Q5HD68, D2NA72, lipC3, lpl, sauS0385, dcm_SauS0385</i>                                                                          | A8YYP8                                  | negative                                                       | negative                                      |
| ST7748<br>(15-G-54)            | Q6GD44                                                                                                                                                              | Q6GKK6, Q7A890                                                                       | 2 copies of <i>lpl, lipC3</i>                                      | Q5HUH7,<br>Q9RL82, A6QDI2                                                                             | <i>exsC, exsB, esaE, exsD, essD, TIGR01741, Q1Y4R2, Q1Y4R3, DUF600</i>                                                                                                 | <i>ssI01, ssI02, ssI03, ssI04, ssI05, ssI07, ssI08, ssI09, ssI10, hsdM/S-ssI, ssI11, slaP, Q2G0X2, 6 copies of lpl, lipC3</i>                                              | <i>oppB-GI-RF122, oppC-GI-RF122, oppD-GI-CIG93, oppF-GI-RF122, oppA-GI-RF122</i> | negative                                                         | Q5HEX7, A5ITW8, Q6GFQ3, DUF955,<br>Q5HEX3, tnp IS3, tnp IS3, r122, <i>sprA, DUF1433, Q2FXD2, hsdS/M-spl, spIF, spIC/B/A, A6QHZ7, ear2, sprB, epiG, A5ITY2, lukD/E, Q2FXA9, Q2FXA8, Q99T51, A6U2S7, Q7A4X2, seg/n/u/i/m/o</i>     | <i>sspP/sspS</i>                                                | <i>teg131, BDS-53E 002366, lpl, Q5HD68, D2NA72, lipC3, 2 copies of lpl, dcm_Sau3AI, sau3AI</i>                                                  | Q5HJU6, sarT,<br>sarU                   | <i>cbiQ, cbiO, UPF0397, DUF62</i>                              | <i>cna</i>                                    |
| ST7749<br>(18-H-62)            | <i>hsdM5, hsdR5, Q6GKL3, C2G798, D2N3E0, Q6GKL1, tnp IS232, Q6GD44</i>                                                                                              | Q6GKK6, Q7A890                                                                       | 3 copies of <i>lpl, hysA, 3 copies of lpl</i>                      | Q5HUH7,<br>Q9RL82, A6QDI2                                                                             | Q6GK23, Q6GK22,<br>Q6GK21, Q2G192,<br>Q6GK19, Q6GK18,<br>Q6GK17, Q9L3N6, 2<br>copies of DUF600,<br>Q1Y4R2, Q1Y4R3, 2<br>copies of DUF600                               | <i>ssI01, ssI02, ssI03, ssI04, ssI05, ssI07, ssI08, ssI09, ssI10, hsdM/S-ssI, ssI11, slaP, Q2G0X2, 6 copies of lpl, lipC3</i>                                              | <i>appA, appD, appF, appB, appC</i>                                              | D9RHF6,<br>Q2YYD5,<br>D9RHF8, <i>stsA</i>                        | Q5HEX7, A5ITW8, Q6GFQ3, DUF955,<br>Q5HEX3, <i>sprA, DUF1433, Q6GFP5, A0A0E1X646, hsdS/M-spl, spIF, spIC/B/A, A6QHZ7, ear2, sprB, epiG, ERS140266 RS14190, epiE/F/P/D/C/B/A, lukD/E, sprC1, Q2FXA9, Q2FXA8, Q7A4X2</i>            | <i>sspP/sspS</i>                                                | <i>teg131, BDS-53E 002366, 2 copies of lpl Q5HD68, D2NA72, lipC3 SACOL2496, 2 copies of lpl dcm_Sau3AI, sau3AI</i>                              | A8YYP8                                  | <i>cbiQ, cbiO, UPF0397, DUF62</i>                              | negative                                      |
| ST7750<br>(26-G-G)             | H0CD41, D2N3D1,<br>Q6GD44                                                                                                                                           | Q6GKK6                                                                               | 3 copies of <i>lpl, lipC3</i>                                      | A5IP65, A5IP66,<br>A5IP67, A5IP68,<br>A5IP69, A5IP70,<br>A5IP71, A5IP72,<br>A6TXY8, A5IP73            | Q6GK23, Q6GK22,<br>Q6GK21, Q2G192,<br>Q6GK19, Q6GK18,<br>Q6GK17, Q9L3N6, 3<br>copies of DUF600,<br>AD196784, DUF4467,<br>DUF4064, DUF5084, 4<br>copies of DUF600       | <i>ssI01, ssI02, ssI03, ssI04, ssI05, ssI07, ssI08, ssI09, ssI10, hsdM/S-ssI, ssI11, slaP, Q2G0X2, 3 copies of lpl, lipC3</i>                                              | <i>appA, appD, appF, appB, appC</i>                                              | Q2YY95,<br><i>sagD, sagC, nfbB, D9RHF6, Q2YYD5, D9RHF8, stsA</i> | DUF1433, <i>hysA, DUF1433, DUF1433, Q6GFP5, A0A0E1X646, hsdS/M-spl, spIF, spIC/B/A, A6QHZ7, ear2, sprB, epiG, A5ITY2, A5ITY3, lukD/E, sprC1, Q2FXA9, Q2FXA8, Q7A4X2</i>                                                          | <i>sspP/sspS</i>                                                | <i>teg131, BDS-53E 002366, 2 copies of lpl Q5HD68, D2NA72, lipC3, 2 copies of lpl, dcm_Sau3AI, sau3AI</i>                                       | A8YYP8,<br><i>sasG, sarT, sarU</i>      | <i>cbiQ, cbiO, UPF0397, DUF62</i>                              | <i>cna</i>                                    |
| ST7751<br>(28-G-1)             | C2G7A0, Q6GKL3,<br>C2G798,<br>UPI0001C11B31,<br>D2N3E0, Q6GKL1,<br>Q6GD44                                                                                           | Q6GKK6, <i>ycjY, G7ZTC1, Q7A890</i>                                                  | <i>lpl, hysA, 4<br/>copies of lpl</i>                              | Q5HUH7,<br>Q9RL82, A6QDI2                                                                             | <i>exsC, exsB, esaE, exsD, essD, Q1Y4R2, Q1Y4R3, Q9L3N6, 2 copies of DUF600, Q1Y4R2, Q1Y4R3, TIGR01741, DUF600</i>                                                     | <i>ssI01, ssI02, ssI03, ssI04, ssI05, ssI07, ssI08, ssI09, ssI10, hsdM/S-ssI, ssI11, slaP, Q2G0X2, 3 copies of lpl</i>                                                     | <i>appA, appD, appF, appB, appC</i>                                              | negative                                                         | Q5HEX7, A5ITW8, DUF955, Q5HEX3,<br>DUF1433, <i>sprA, DUF1433, DUF1433, hsdS/M-spl, spIF, spIC/B/A, A6QHZ7, ear2, sprB, epiG, A5ITY2, A5ITY3, lukD/E, Q2FXA9, Q2FXA8, Q7A4X2</i>                                                  | <i>sspP/sspS</i>                                                | <i>teg131, lpl, Q5HD68, D2NA72, lipC3, 3 copies of lpl dcm_Sau3AI, sau3AI</i>                                                                   | Q5HJU6, sarT,<br>sarU                   | <i>cbiQ, cbiO, UPF0397, DUF62</i>                              | negative                                      |
| ST7752<br>(30-P-10)            | Q7A899, <i>dusC</i> -trnc,<br>DUF81-GI, <i>csrR/A/B-GI, sgr, yxiE2</i>                                                                                              | Q5HJT2, Q6GD34,<br>A6QD75, A6QD76,<br>A8YZ18, Q6GKK6,<br><i>ycjY, G7ZTC1</i>         | 5 copies of <i>lpl</i>                                             | Q5HUH7,<br>Q9RL82, A6QDI2                                                                             | A0A0Z1N098,<br>A0A0U0VFZ6,<br>A0A122YW60,<br>AD196784, DUF4064,<br>DUF5084, Q1Y4R2,<br>Q1Y4R3, Q9L3N6, 2<br>copies of DUF600,<br>Q1Y4R2, Q1Y4R3, 4<br>copies of DUF600 | <i>ssI01, ssI02, ssI03, ssI04, ssI05, ssI06, ssI07, ssI08, ssI09, ssI10, hsdM/S-ssI, ssI11, slaP, Q2G0X2, 5 copies of lpl, lipC3</i>                                       | <i>appA, appD, appF, appB, appC</i>                                              | negative                                                         | Q5HEX7, A5ITW8, Q6GFQ3, DUF955,<br>Q5HEX3, <i>fstAT, AJP22988, DUF1433, DUF1433, Q6GFP5, A0A0E1X646, hsdS/M-spl, spIF, spIC/B/A, A6QHZ7, ear2, sprB, epiG, A5ITY2, A5ITY3, lukD/E</i>                                            | <i>sspP/sspS</i>                                                | <i>teg131, lpl-locus-2500, dcm_Sau3AI, sau3AI</i>                                                                                               | A8YYP8                                  | <i>cbiQ, cbiO, UPF0397, DUF62</i>                              | negative                                      |
| ST7753<br>(32-T-13)            | <i>mcrC, dhIC</i> -trnc,<br>Q6GD44                                                                                                                                  | Q6GKK6, Q7A890                                                                       | 6 copies of <i>lpl</i>                                             | Q5HUH7,<br>Q9RL82, A6QDI2                                                                             | <i>exsC, exsB, esaE, exsD, essD, Q1Y4R2, Q1Y4R3, 3 copies of DUF600, Q1Y4R2, Q1Y4R3, 2 copies of DUF600, AD196784, DUF4064, DUF5084, 3 copies of DUF600</i>            | <i>ssI01, ssI02, ssI03, ssI04, ssI05, ssI07, ssI08, ssI09, ssI10, hsdM/S-ssI, ssI11, slaP, Q2G0X2, tnp IS232, istB2 IS232, 4 copies of lpl,</i>                            | <i>appA, appD, appF, appB, appC</i>                                              | D9RHF6,<br>Q2YYD5,<br>D9RHF8, <i>stsA</i>                        | Q6GFQ3, DUF955, Q5HEX3, <i>sprA, DUF1433, Q6GFP5, A0A0E1X646, hsdS/M-spl, spIF, spIC/B/A, A6QHZ7, ear2, sprB, epiG, A5ITY2, A5ITY3, lukD/E, Q2FXA9, Q2FXA8, Q7A4X2</i>                                                           | <i>sspP/sspS</i>                                                | <i>teg131, Q5HD68, D2NA72, lipC3, lpl, tx universal3, dcm_SauRF122, sauRF122</i>                                                                | A8YYP8                                  | <i>cbiQ, cbiO, UPF0397, DUF62</i>                              | <i>cna</i>                                    |
| ST7754<br>(39-B-49)            | C1PH94, C1PH95,<br>istB2 IS232,<br>tnp IS232, <i>lrpC, Q6GD44, tnp IS1272, DUF81-GI, csrR/A/B-GI, sgr, yxiE2</i>                                                    | Q6GKK6, Q7A890                                                                       | <i>lpl, lipC3</i>                                                  | Q5HUH7,<br>Q9RL82, A6QDI2                                                                             | Q6GK23, Q6GK22,<br>Q6GK21, Q2G192,<br>Q6GK19, Q6GK18,<br>Q6GK17, Q9L3N6, 2<br>copies of DUF600                                                                         | <i>ssI01, ssI02, ssI03, ssI04, ssI05, ssI07, ssI08, ssI09, ssI10, hsdM/S-ssI, ssI11, slaP, Q2G0X2, 3 copies of lpl, lipC3</i>                                              | <i>appA, appD, appF, appB, appC</i>                                              | Q931R4                                                           | Q6GFQ3, DUF955, Q5HEX3, tnp IS3,<br>tnp IS3, r122, <i>sprA, DUF1433, Q2FXD2, hsdS/M-spl, spIF, spIC/B/A, A6QHZ7, ear2, sprB, epiG, A5ITY2, A5ITY3, lukD/E, sprC1, Q2FXA9, Q2FXA8, Q7A4X2</i>                                     | <i>sspP/sspS</i>                                                | Q5HD68, D2NA72, <i>lipC3, 2 copies of lpl sauUSI, nudix</i>                                                                                     | negative                                | <i>cbiQ, cbiO, UPF0397, DUF62</i>                              | <i>cna</i>                                    |
