# Supplementary material for: Sequence Analysis of Novel Staphylococcus aureus Lineages from Wild and Captive Macaques
Source: MDPI journal article supplement (doi:10.3390/ijms231911225), 2022-09-23
Supplement: s1 [file s1]

## 1. Genes used for tree construction

| Gene ID          | GenBank coordinates                 | ID used in PubMLST<br>cgMLST scheme |
|------------------|-------------------------------------|-------------------------------------|
| <b>dnaA</b>      | (MW2-BA000033-[517:1878])           | SAUR0001 (SAR_RS00005)              |
| <b>gyrB</b>      | (MW2-BA000033-[5034:6968])          | SAUR0005 (SAR_RS00025)              |
| <b>walR</b>      | (MW2-BA000033-[24930:25631])        | SAUR0020 (SAR_RS00100)              |
| <b>walK</b>      | (MW2-BA000033-[25644:27470])        | SAUR0021 (SAR_RS00105)              |
| <b>orfX</b>      | (MW2-BA000033-[33689:34168])        | SAUR0026 (SAR_RS00130)              |
| <b>sarS</b>      | (CA347-CP006044-[136199:136951])    |                                     |
| <b>sirB</b>      | (MW2-BA000033-[103544:104539])      | SAUR0111 (SAR_RS00555)              |
| <b>sbnB</b>      | (MW2-BA000033-[106755:107765])      | SAUR0114 (SAR_RS00570)              |
| <b>sbnI</b>      | (MW2-BA000033-[116231:116995])      | SAUR0121 (SAR_RS00605)              |
| <b>rpiRB</b>     | (MW2-BA000033-[199250:200128])      |                                     |
| <b>ssaA</b>      | (MW2-BA000033-[304578:305480])      |                                     |
| <b>esaB</b>      | (N315-BA000018-[330908:331150])     | SAUR0284 (SAR_RS01420)              |
| <b>thlA=yqil</b> | (MW2-BA000033-[378859:380040])      | SAUR0353 (SAR_RS01765)              |
| <b>rpsR</b>      | (MW2-BA000033-[392495:392737])      |                                     |
| <b>nfrA</b>      | (MW2-BA000033-[404682:405437])      | SAUR0403 (SAR_RS02015)              |
| <b>xpt</b>       | (MW2-BA000033-[410879:411457])      | SAUR0409 (SAR_RS02045)              |
| <b>pbuX</b>      | (MW2-BA000033-[411457:412725])      | SAUR0410 (SAR_RS02050)              |
| <b>mpsC=ybcI</b> | (MW2-BA000033-[460582:460944])      | SAUR0450 (SAR_RS02250)              |
| <b>yaaK</b>      | (N315-BA000018-[504381:504698])     | SAUR0477 (SAR_RS02385)              |
| <b>recR</b>      | (MW2-BA000033-[490084:490680])      | SAUR0478 (SAR_RS02390)              |
| <b>glmU</b>      | (MW2-BA000033-[512249:513601])      | SAUR0505 (SAR_RS02525)              |
| <b>pth</b>       | (MW2-BA000033-[515827:516399])      | SAUR0509 (SAR_RS02545)              |
| <b>ctsR</b>      | (N315-BA000018-[560629:561090])     | SAUR0546 (SAR_RS02730)              |
| <b>mrnC</b>      | (N315-BA000018-[572547:572951])     |                                     |
| <b>yacO</b>      | (MW2-BA000033-[563521:564267])      | SAUR0557 (SAR_RS02785)              |
| <b>secE</b>      | (COL-CP000046-[602561:602743])      |                                     |
| <b>rplK</b>      | (N315-BA000018-[576117:576539])     | SAUR0562 (SAR_RS02810)              |
| <b>rplA</b>      | (11819-97-CP003194-[574818:575510]) |                                     |
| <b>rpoC</b>      | (MW2-BA000033-[573870:577493])      | SAUR0568 (SAR_RS02840)              |
| <b>tuf</b>       | (MW2-BA000033-[581352:582536])      | SAUR0573 (SAR_RS02865)              |
| <b>thiD1</b>     | (11819-97-CP003194-[629476:630306]) | SAUR0603 (SAR_RS03015)              |
| <b>pta</b>       | (11819-97-CP003194-[636472:637458]) | SAUR0611 (SAR_RS03055)              |
| <b>mvaD</b>      | (MW2-BA000033-[632126:633109])      | SAUR0614 (SAR_RS03070)              |
| <b>mvaK2</b>     | (MW2-BA000033-[633122:634198])      | SAUR0615 (SAR_RS03075)              |
| <b>A5IQH4</b>    | (CA347-CP006044-[681325:681885])    |                                     |
| <b>mrpE</b>      | (MW2-BA000033-[671224:671706])      | SAUR0651 (SAR_RS03255)              |
| <b>mntB</b>      | (N315-BA000018-[681665:682501])     | SAUR0659 (SAR_RS03295)              |
| <b>mntA</b>      | (CA347-CP006044-[692970:693713])    |                                     |
| <b>mntR</b>      | (MW2-BA000033-[678714:679358])      | SAUR0661 (SAR_RS03305)              |
| <b>tarH</b>      | (MW2-BA000033-[681251:682045])      | SAUR0664 (SAR_RS03320)              |
| <b>yxkD</b>      | (MW2-BA000033-[691596:692429])      | SAUR0673 (SAR_RS03365)              |
| <b>dakL</b>      | (MW2-BA000033-[696806:697390])      | SAUR0678 (SAR_RS03390)              |
| <b>murB</b>      | (N315-BA000018-[791508:792431])     | SAUR0806 (SAR_RS04030)              |
| <b>gapA</b>      | (MW2-BA000033-[827901:828911])      | SAUR0845 (SAR_RS04225)              |
| <b>tpi</b>       | (MW2-BA000033-[830362:831123])      | SAUR0847 (SAR_RS04235)              |

| Gene ID      | GenBank coordinates                   | ID used in PubMLST<br>cgMLST scheme |
|--------------|---------------------------------------|-------------------------------------|
| secG         | (CA347-CP006044-[851386:851619])      |                                     |
| est          | (MW2-BA000033-[835290:836030])        | SAUR0852 (SAR_RS04260)              |
| ssrP         | (MW2-BA000033-[838458:838922])        | SAUR0854 (SAR_RS04270)              |
| cspC-L1      | (MSHR1132-FR821777-[843125:843325])   |                                     |
| ntrA         | (MW2-BA000033-[872472:873011])        | SAUR0878 (SAR_RS04390)              |
| metN1        | (MW2-BA000033-[877242:878267])        | SAUR0886 (SAR_RS04430)              |
| dltD         | (N315-BA000018-[901367:902542])       | SAUR0914 (SAR_RS04570)              |
| nfuA         | (MW2-BA000033-[902717:902938])        |                                     |
| kapB         | (MW2-BA000033-[918173:918556])        | SAUR0932 (SAR_RS04660)              |
| pgi          | (MW2-BA000033-[928831:930162])        | SAUR0941 (SAR_RS04705)              |
| sufT=paaD    | (MW2-BA000033-[943736:944044])        | SAUR0952 (SAR_RS04760)              |
| A6U088       | (N315-BA000018-[954670:954855])       | SAUR0961 (SAR_RS04805)              |
| fabH         | (MW2-BA000033-[955118:956059])        | SAUR0962 (SAR_RS04810)              |
| ppnK         | (MW2-BA000033-[978805:979614])        | SAUR0990 (SAR_RS04950)              |
| ugtP         | (MW2-BA000033-[990850:992025])        | SAUR1002 (SAR_RS05010)              |
| defB=def1    | (MW2-BA000033-[1070556:1071107])      | SAUR1086 (SAR_RS05430)              |
| pdhD         | (MW2-BA000033-[1075749:1077155])      | SAUR1091 (SAR_RS05455)              |
| potD         | (MW2-BA000033-[1080993:1082066])      | SAUR1097 (SAR_RS05485)              |
| ylbN=Q4L5E0  | (11819-97-CP003194-[1137445:1138002]) | SAUR1122 (SAR_RS05610)              |
| isdG         | (MW2-BA000033-[1113916:1114239])      | SAUR1132 (SAR_RS05660)              |
| spoU         | (11819-97-CP003194-[1146950:1147690]) | SAUR1134 (SAR_RS05670)              |
| mraW=rsmH    | (MW2-BA000033-[1156518:1157432])      |                                     |
| gmk          | (MW2-BA000033-[1190834:1191457])      | SAUR1210 (SAR_RS06050)              |
| rlmN         | (11819-97-CP003194-[1232662:1233756]) | SAUR1219 (SAR_RS06095)              |
| prkC=pknB    | (MW2-BA000033-[1202183:1204177])      | SAUR1221 (SAR_RS06105)              |
| rpmB         | (RF122-AJ938182-[1174752:1174940])    |                                     |
| yloU         | (11819-97-CP003194-[1239905:1240279]) | SAUR1226 (SAR_RS06130)              |
| ftsY         | (MW2-BA000033-[1220509:1221759])      | SAUR1237 (SAR_RS06185)              |
| ylxM         | (MW2-BA000033-[1221746:1222078])      | SAUR1238 (SAR_RS06190)              |
| rpsP         | (N315-BA000018-[1224108:1224383])     | SAUR1240 (SAR_RS06200)              |
| tsf          | (MW2-BA000033-[1246279:1247160])      | SAUR1262 (SAR_RS06310)              |
| pyrH         | (MW2-BA000033-[1247297:1248019])      | SAUR1263 (SAR_RS06315)              |
| cdsA         | (MW2-BA000033-[1249742:1250524])      | SAUR1266 (SAR_RS06330)              |
| rbfA         | (N315-BA000018-[1263268:1263618])     | SAUR1275 (SAR_RS06375)              |
| ribF         | (MW2-BA000033-[1264851:1265822])      | SAUR1277 (SAR_RS06385)              |
| rpsO         | (N315-BA000018-[1265805:1266074])     | SAUR1278 (SAR_RS06390)              |
| pgsA         | (N315-BA000018-[1278452:1279030])     | SAUR1288 (SAR_RS06440)              |
| glpF         | (N315-BA000018-[1296691:1297509])     | SAUR1303 (SAR_RS06515)              |
| glpK         | (MW2-BA000033-[1297775:1299271])      | SAUR1304 (SAR_RS06520)              |
| Q99UF3       | (N315-BA000018-[1321100:1321288])     | SAUR1359 (SAR_RS06795)              |
| alsT         | (MW2-BA000033-[1360967:1362427])      | SAUR1397 (SAR_RS06985)              |
| msrA1        | (MW2-BA000033-[1368327:1368836])      | SAUR1402 (SAR_RS07010)              |
| tyrA         | (MW2-BA000033-[1371775:1372866])      | SAUR1407 (SAR_RS07035)              |
| dapD         | (MW2-BA000033-[1405382:1406101])      | SAUR1438 (SAR_RS07190)              |
| cspC-L2=msaB | (CA347-CP006044-[1416364:1416564])    |                                     |
| asnS         | (MW2-BA000033-[1493287:1494579])      | SAUR1498 (SAR_RS07490)              |
| ypiA         | (MW2-BA000033-[1503738:1504982])      | SAUR1507 (SAR_RS07535)              |

| Gene ID   | GenBank coordinates                   | ID used in PubMLST<br>cgMLST scheme |
|-----------|---------------------------------------|-------------------------------------|
| ndk       | (MW2-BA000033-[1509350:1509799])      | SAUR1511 (SAR_RS07555)              |
| ubiE      | (MW2-BA000033-[1510852:1511577])      | SAUR1513 (SAR_RS07565)              |
| ansA      | (MW2-BA000033-[1518182:1519150])      | SAUR1524 (SAR_RS07620)              |
| xerD      | (N315-BA000018-[1536101:1536988])     | SAUR1611 (SAR_RS08055)              |
| lpdA      | (MW2-BA000033-[1604342:1605763])      | SAUR1635 (SAR_RS08175)              |
| xseA      | (MW2-BA000033-[1609575:1610912])      | SAUR1640 (SAR_RS08200)              |
| efp       | (MW2-BA000033-[1614048:1614605])      | SAUR1645 (SAR_RS08225)              |
| glk       | (N315-BA000018-[1582174:1583160])     | SAUR1664 (SAR_RS08320)              |
| sodA-L2   | (MW2-BA000033-[1633614:1634213])      | SAUR1670 (SAR_RS08350)              |
| dgkA      | (N315-BA000018-[1604006:1604350])     | SAUR1686 (SAR_RS08430)              |
| prmA      | (MW2-BA000033-[1656890:1657828])      | SAUR1695 (SAR_RS08475)              |
| dnaK      | (11819-97-CP003194-[1688529:1690361]) | SAUR1697 (SAR_RS08485)              |
| aroE      | (MW2-BA000033-[1673986:1674792])      | SAUR1712 (SAR_RS08560)              |
| hisS      | (CA347-CP006044-[1711663:1712925])    |                                     |
| yajC      | (MRSA252-BX571856-[1784283:1784543])  |                                     |
| ruvA      | (11819-97-CP003194-[1751933:1752535]) | SAUR1760 (SAR_RS08800)              |
| pheB      | (11819-97-CP003194-[1752549:1753007]) |                                     |
| rpmA      | (11819-97-CP003194-[1755197:1755481]) | SAUR1763 (SAR_RS08815)              |
| DUF464    | (MW2-BA000033-[1725961:1726281])      | SAUR1764 (SAR_RS08820)              |
| rpIT      | (N315-BA000018-[1710716:1711072])     | SAUR1798 (SAR_RS08990)              |
| rpmI      | (N315-BA000018-[1711119:1711319])     | SAUR1799 (SAR_RS08995)              |
| infC      | (MW2-BA000033-[1750369:1750896])      | SAUR1800 (SAR_RS09000)              |
| pykA      | (MW2-BA000033-[1773276:1775033])      | SAUR1818 (SAR_RS09090)              |
| pfkA      | (MW2-BA000033-[1775055:1776023])      | SAUR1819 (SAR_RS09095)              |
| accA      | (N315-BA000018-[1737273:1738217])     | SAUR1820 (SAR_RS09100)              |
| tpx       | (MW2-BA000033-[1793401:1793895])      | SAUR1834 (SAR_RS09170)              |
| yoxC      | (N315-BA000018-[1788940:1789431])     | SAUR1866 (SAR_RS09330)              |
| pepA1     | (MW2-BA000033-[1834312:1835388])      | SAUR1872 (SAR_RS09360)              |
| putA      | (MW2-BA000033-[1861651:1862652])      | SAUR1898 (SAR_RS09490)              |
| menC      | (MW2-BA000033-[1884490:1885491])      | SAUR1924 (SAR_RS09620)              |
| hemE      | (MW2-BA000033-[1928290:1929327])      | SAUR1977 (SAR_RS09885)              |
| prsA2     | (MW2-BA000033-[1934731:1935693])      | SAUR1985 (SAR_RS09925)              |
| vraR      | (MW2-BA000033-[1987314:1987943])      | SAUR2061 (SAR_RS10305)              |
| ftnA      | (MW2-BA000033-[1996034:1996534])      | SAUR2071 (SAR_RS10355)              |
| gatC      | (COL-CP000046-[2023183:2023485])      |                                     |
| A6U340    | (N315-BA000018-[2000746:2000922])     | SAUR2117 (SAR_RS10585)              |
| groL      | (MW2-BA000033-[2100933:2102549])      | SAUR2199 (SAR_RS10995)              |
| yheS      | (MW2-BA000033-[2118912:2120840])      | SAUR2217 (SAR_RS11085)              |
| yedJ      | (MW2-BA000033-[2171330:2171977])      | SAUR2269 (SAR_RS11345)              |
| rpmE      | (MSHR1132-FR821777-[2115853:2116107]) |                                     |
| murZ      | (MW2-BA000033-[2201005:2202264])      | SAUR2307 (SAR_RS11535)              |
| pyrG      | (MW2-BA000033-[2204438:2206048])      | SAUR2310 (SAR_RS11550)              |
| coaW      | (MW2-BA000033-[2208310:2209113])      | SAUR2313 (SAR_RS11565)              |
| glmM      | (MW2-BA000033-[2245874:2247229])      | SAUR2343 (SAR_RS11715)              |
| cdaA=dacA | (MW2-BA000033-[2248190:2248999])      | SAUR2345 (SAR_RS11725)              |
| rpIM      | (N315-BA000018-[2290241:2290678])     | SAUR2407 (SAR_RS12035)              |
| rpoA      | (MW2-BA000033-[2306516:2307460])      | SAUR2415 (SAR_RS12075)              |

| Gene ID             | GenBank coordinates                   | ID used in PubMLST<br>cgMLST scheme |
|---------------------|---------------------------------------|-------------------------------------|
| <b>infA</b>         | (RF122-AJ938182-[2247044:2247262])    |                                     |
| <b>rplF</b>         | (N315-BA000018-[2301007:2301543])     | SAUR2426 (SAR_RS12130)              |
| <b>Q5HDQ1</b>       | (N315-BA000018-[2361456:2361707])     |                                     |
| <b>panC</b>         | (MW2-BA000033-[2680143:2680994])      | SAUR2808 (SAR_RS14040)              |
| <b>lqo</b>          | (MW2-BA000033-[2690198:2691694])      | SAUR2818 (SAR_RS14090)              |
| <b>cudT</b>         | (MW2-BA000033-[2700793:2702415])      | SAUR2827 (SAR_RS14135)              |
| <b>gpxA-L2</b>      | (MW2-BA000033-[2710352:2710849])      | SAUR2837 (SAR_RS14185)              |
| <b>estA</b>         | (N315-BA000018-[2717418:2718179])     | SAUR2850 (SAR_RS14250)              |
| <b>arcR</b>         | (MW2-BA000033-[2723477:2724181])      | SAUR2852 (SAR_RS14260)              |
| <b>arcC-L2</b>      | (MW2-BA000033-[2724280:2725221])      | SAUR2853 (SAR_RS14265)              |
| <b>cspC-L3=cspB</b> | (MSHR1132-FR821777-[2754573:2754773]) |                                     |
| <b>rsmG=gidB</b>    | (MW2-BA000033-[2815456:2816175])      | SAUR2935 (SAR_RS14675)              |
| <b>mnmg=gidA</b>    | (MW2-BA000033-[2816175:2818052])      | SAUR2936 (SAR_RS14680)              |
| <b>rnpA</b>         | (MW2-BA000033-[2819637:2819984])      | SAUR2938 (SAR_RS14690)              |
| <b>rpmH</b>         | (MRSA252-BX571856-[2902268:2902405])  |                                     |

## 2. Strains used for tree construction

| Clonal Complex<br>or Sequence Type | Strain        | Accession No. |
|------------------------------------|---------------|---------------|
| CC1                                | MSSA476       | BX571857      |
| CC1                                | MW2           | BA000033      |
| CC1                                | TCH70         | ACHH          |
| CC5                                | 04-02981      | CP001844      |
| CC5                                | 06BA18369     | ARXY          |
| CC5                                | CIG1150       | AHVH          |
| CC5                                | ED98          | CP001781      |
| CC5                                | JH1           | CP000736      |
| CC5                                | JH9           | CP000703      |
| CC5                                | Mu3           | AP009324      |
| CC5                                | Mu50          | BA000017      |
| CC5                                | N315          | BA000018      |
| CC5                                | Strain 10388  | HE579059      |
| CC5                                | VRS10         | AHBT          |
| CC6                                | PFESA1528     | FKTB          |
| CC6                                | Strain394     | JVIV          |
| CC7                                | Strain 8-2300 | CP015646      |
| CC7                                | TCH959        | AASB          |
| CC8                                | CIG2018       | AHVV          |
| CC8                                | CIG547        | AHVQ          |
| CC8                                | COL           | CP000046      |
| CC8                                | FPR3757       | CP000255      |
| CC8                                | M1            | HF937103      |
| CC8                                | MRSA177       | AECP          |
| CC8                                | NCTC8325      | CP000253      |
| CC8                                | Newman        | AP009351      |
| CC8                                | NRS100        | CP007539      |

|                    |               |          |
|--------------------|---------------|----------|
| CC8                | TCH1516       | CP000730 |
| CC9                | Strain 21334  | AGTW     |
| CC10               | H19ST10       | ACSS     |
| CC12               | KLT6          | APFH     |
| CC12               | Strain 21266  | AFTT     |
| CC15               | CIGC93        | AHVD     |
| CC15               | KPL1828       | AZJB     |
| CC15               | RUH71         | NHZV     |
| CC15               | VCU006        | AGTZ     |
| CC15-ST582         | 08-02119-     | CP015645 |
| CC20               | PFESA2437     | FKPW     |
| CC22               | H-EMRSA-15    | CP007659 |
| CC22               | HO5096-0412   | HE681097 |
| CC22               | IS-105        | AHLR     |
| CC22               | Strain 21310  | AFNP     |
| CC25               | Strain 21193  | AFEG     |
| CC30               | 68-397        | ACJT     |
| CC30               | Btn1260       | ACUU     |
| CC30               | CIG1605       | AHKE     |
| CC30               | EMRSA16       | ADAT     |
| CC30               | M876          | ACJV     |
| CC30               | MRSA252       | BX571856 |
| CC30               | WBG10049      | ACSV     |
| CC45 agr I         | A9635         | ACKI     |
| CC45 agr I         | CA347         | CP006044 |
| CC45 agr I         | CIG1524       | AHVI     |
| CC45 agr IV caps 5 | BU N22t6      | LFNS     |
| CC45 agr IV caps 8 | CIG290        | AIES     |
| CC45 agr IV caps 8 | Strain 21252  | AHJV     |
| CC49               | Strain 21262  | AHJW     |
| CC49               | Tager 104     | CP012409 |
| CC49               | WT65          | CP084107 |
| CC50               | Strain 6850   | CP006706 |
| CC59               | PM1           | BAFA     |
| CC59               | SA40          | CP003604 |
| CC59               | SA957         | CP003603 |
| CC72               | CN1           | CP003979 |
| CC72               | TCH130        | ACHD     |
| CC80               | 11819-97      | CP003194 |
| CC80               | Strain 103564 | AHZI     |
| CC80               | Strain 21333  | AHKA     |
| CC88               | HST105        | AZTH     |
| CC88               | Strain 21343  | AHKV     |
| CC93               | JKD6159       | CP002114 |
| CC96               | KPL1845       | AZJA     |
| CC97               | IS-55         | AHLN     |
| CC97               | Newbould 305  | AKYW     |
| CC97               | PB32          | ANIB     |

|        |                 |                   |
|--------|-----------------|-------------------|
| CC101  | SA083           | JXIE              |
| CC121  | 93bS9           | CP010952          |
| CC121  | Strain 21269    | AFTU              |
| CC126  | Sa1FB           | PATRIC128024396   |
| CC130  | O11             | CP024649          |
| CC133  | ED133           | CP001996          |
| ST140  | Kenyaseq6547225 | ERR1764920        |
| ST140  | SO-1977         | SRR5682128        |
| CC152  | 55-99-44        | CP024998          |
| CC152  | BB155-          | LN854556          |
| CC188  | CUHK HK188      | JFFV              |
| CC188  | Strain 21340    | AGTX              |
| ST291  | SA3-LAU         | JHDV              |
| CC361  | GR1             | AJLX              |
| CC361  | VH221           | AOFX              |
| CC395  | Strain 21202    | AGRO              |
| CC398  | 08BA02176       | CP003808          |
| CC398  | 112808A         | AHZK              |
| CC398  | S0385           | AM990992          |
| CC398  | S100            | AUPV              |
| CC425  | LGA251          | FR821779          |
| CC479  | Strain 685      | LRNB              |
| CC599  | H11240036       | ERR175867         |
| CC692  | K12S0375        | JYGF              |
| CC705  | RF122           | AJ938182          |
| CC707  | Strain 21235    | AFTQ              |
| CC772  | CO08            | AJKD              |
| CC772  | KTY21           | AOCQ              |
| CC772  | VH60            | ALWG              |
| CC779  | st2344          | FGWF              |
| CC913  | H1772           | OFVV              |
| CC1153 | 3688STDY6124889 | FQHT              |
| CC1153 | Dubai M58       | CP065857          |
| CC1290 | 015H            | FMMV              |
| CC1464 | ST1464          | ANIT              |
| CC1943 | H105140339      | ERR084755         |
| CC1956 | WT19            | CP084892          |
| CC2972 | SS015           | FQIU              |
| ST2990 | 27-G-H          | <i>this study</i> |
| ST2990 | HS-MSSA         | VCMW              |
| ST3268 | TXA             | SAMN04362246      |
| ST3268 | TXB             | SAMN04362247      |
| ST4168 | 16CS0209        | <i>this study</i> |
| CC4803 | NN50            | BAEA              |
| ST7687 | 01-RR-86        | <i>this study</i> |
| ST7688 | 05-RR-90        | <i>this study</i> |
| ST7689 | 08-G-E          | <i>this study</i> |
| ST7690 | 09-G-F          | <i>this study</i> |

|                                                           |                 |                   |
|-----------------------------------------------------------|-----------------|-------------------|
| <b>ST7691</b>                                             | <b>13-G-52</b>  | <i>this study</i> |
| <b>ST7692</b>                                             | <b>17-H-61</b>  | <i>this study</i> |
| <b>ST7693</b>                                             | <b>29-P-01</b>  | <i>this study</i> |
| <b>ST7694</b>                                             | <b>40-B-50</b>  | <i>this study</i> |
| <b>ST7695</b>                                             | <b>16CS0212</b> | <i>this study</i> |
| <b>ST7745</b>                                             | <b>03-RR-88</b> | <i>this study</i> |
| <b>ST7746</b>                                             | <b>07-G-D</b>   | <i>this study</i> |
| <b>ST7747</b>                                             | <b>12-G-51</b>  | <i>this study</i> |
| <b>ST7748</b>                                             | <b>15-G-54</b>  | <i>this study</i> |
| <b>ST7749</b>                                             | <b>18-H-62</b>  | <i>this study</i> |
| <b>ST7750</b>                                             | <b>26-G-G</b>   | <i>this study</i> |
| <b>ST7751</b>                                             | <b>28-G-I</b>   | <i>this study</i> |
| <b>ST7752</b>                                             | <b>30-P-10</b>  | <i>this study</i> |
| <b>ST7753</b>                                             | <b>32-T-13</b>  | <i>this study</i> |
| <b>ST7754</b>                                             | <b>39-B-49</b>  | <i>this study</i> |
| <i>S. argenteus</i> CC1223                                | M051            | CCEN              |
| <i>S. argenteus</i> CC1850                                | MSHR1132        | FR821777          |
| <i>S. argenteus</i> CC2198                                | M260            | CCEF              |
| <i>S. argenteus</i> CC2250                                | F87619          | JGHK              |
| <i>S. argenteus</i> CC2250                                | M21126          | JGMK              |
| <i>S. argenteus</i> CC2596                                | H115100079      | CCEP              |
| <i>S. argenteus</i> CC4587                                | JABA32044V6S1   | CCEE              |
| <i>S. roterodami</i> ST3963                               | BDS-54          | CP092782          |
| <i>S. roterodami</i> ST4326                               | BDS-53E         | CP092783          |
| <i>S. roterodami/singaporensis</i> ST6107                 | SS60            | JABWHF            |
| <i>S. roterodami/singaporensis</i> ST6109                 | SS90            | JABWHD            |
| <i>S. roterodami</i> ST6999                               | EMCR19          | CAJGUT            |
| <i>S. roterodami</i> ST7342                               | Zoo28           | CP092781.1        |
| <i>S. schweitzeri</i> CC2059                              | FSCB1B          | CCEG              |
| <i>S. schweitzeri</i><br>ST (206 303 253 142 196 202 197) | FSA090          | CCEO              |
| <i>S. schweitzeri</i> ST1872                              | FSA037          | CCEH              |
| <i>S. schweitzeri</i> ST2022                              | FSA084          | CCEL              |
| <i>S. schweitzeri</i> ST2058                              | FSCB5           | CCEQ              |
| <i>S. schweitzeri</i> ST2074                              | FSA096          | CCEK              |
